# Supplementary material
Source: PubMed Central journal article supplement (PMC3717189)
Supplement: 97320630009599S1.pdf [file 97320630009599S1.pdf]

## Supplementary material:

**Table 1:** Parameter ranges used for data assembly with Velvet and Edena

| Parameter         | Initial value | Final value | Interval |
|-------------------|---------------|-------------|----------|
| k-mer             | 29            | 45          | 2        |
| Coverage cutoff   | 5             | 15          | 2        |
| Expected Coverage | 60            | 300         | 40       |

**Table 2:** Results of the BLASTN program considering the contigs as query and the reference genome as subject

| Criteria                                                      | Quantity            |
|---------------------------------------------------------------|---------------------|
| Contigs with single alignments                                | 4774 (3,338,615 bp) |
| Contigs with alignments in more than one region of the genome | 344 (1,195,432 bp)  |
| Contigs without significant alignment                         | 35 (37,138 bp)      |
| Contigs that did not align                                    | 118 (52,536 bp)     |
